# Supplementary material for: The prognostic value of TP53 mutations in oesophageal adenocarcinoma: a systematic review and meta-analysis
Source: PubMed Central journal article supplement (PMC5534764; doi:10.1136/gutjnl-2015-310888), 2016-01-05
Supplement: gutjnl-2015-310888supp001.pdf [file gutjnl-2015-310888supp001.pdf]

## **SUPPLEMENTARY DATA**

## **SUPPLEMENTARY FILE 1**

### ***Summary Findings of IARC TP53 Database Analysis***

The most current R17 version of the IARC TP53 database contains three studies<sup>42, 51, 66</sup> that report on the prognostic effect of TP53 mutations in esophageal adenocarcinoma cohorts, all of which are included in our meta-analysis.

In 345 EACs compiled in the IARC TP53 database, the most frequently occurring mutations were G:C to A:T transitions at CpG sites (43.5% of tumors) in exons 5, 7, 8 (Supplementary Figure 1A) with a mean mutation frequency in any single nucleotide at this site of 1.27 (SD 0.03). The most frequent effect of this type of mutation was missense mutations (found in 78% of p53 mutations; Supplementary Figure 1B).

Of all the tumors included in the database, 245 had information on their immunohistochemistry staining pattern. Missense mutations most frequently caused positive immuno-staining and occurred most commonly within the L2/L3, L1/S/H2 and NDBL/beta-sheet protein domains (Supplementary Figure 1C and 1D). However, approximately 27% of TP53 mutant tumors showed negative immuno-staining patterns (false negatives), as these are frequently deletion mutations (Supplementary Figure 2).

## **SUPPLEMENTARY FIGURE LEGENDS**

**Supplementary Figure 1.** Analysis of EAC patients (n = 345) in the IARC TP53 mutation database. Supplementary Figure 1A depicts the frequency of types of TP53 gene mutations as well as their genetic location. Supplementary Figure 1B shows the resulting effects of these mutations on protein isotypes. Supplementary Figure 1C shows the corresponding IHC staining patterns of the type of TP53 gene mutations, where 1D shows how the TP53 mutation effect affects IHC staining patterns (EAC n = 245).

**Supplementary Figure 2.** Analysis of IARC TP53 database to determine frequency of interpretations of immunohistochemistry staining patterns in the presence of TP53 gene mutations.

**Supplementary Figure 3.** Funnel plot of all studies included in the present meta-analysis for assessment of possible publication bias.

**Supplementary Figure 4.** Forest plot of the effect of TP53 on survival stratified by histology and adjustment for standard prognostic variables, all studies.

**Supplementary Figure 5.** Forest plot of effect of TP53 on survival only including studies performing TP53 gene sequencing before (supplementary figure 5A) and after sensitivity analysis (removal of Gibson et al.; 5B). Supplementary figure 5C depicts the forest plot of studies with pure EAC cohorts that performed TP53 gene sequencing.

**Supplementary Figure 6.** Forest plot of meta-regression analysis of study factors associated inter-study heterogeneity. Depicted are the effect estimates (solid squares) of change in log HR and corresponding 95% confidence interval (95%CI, solid line). Total (solid diamond) represents the overall effect estimate (log HR) of mutant TP53 and corresponding 95%CI as calculated from all 16 included studies.

# Supplementary Figure 1.

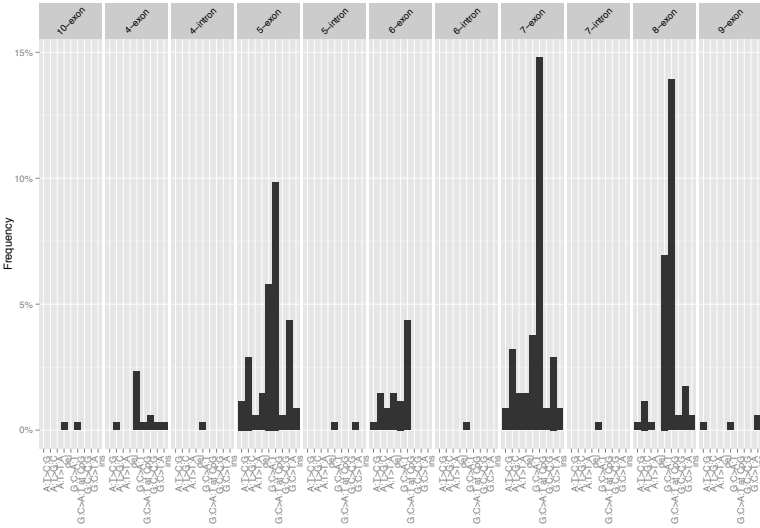

**A** TP53 Mutations & Gene Location

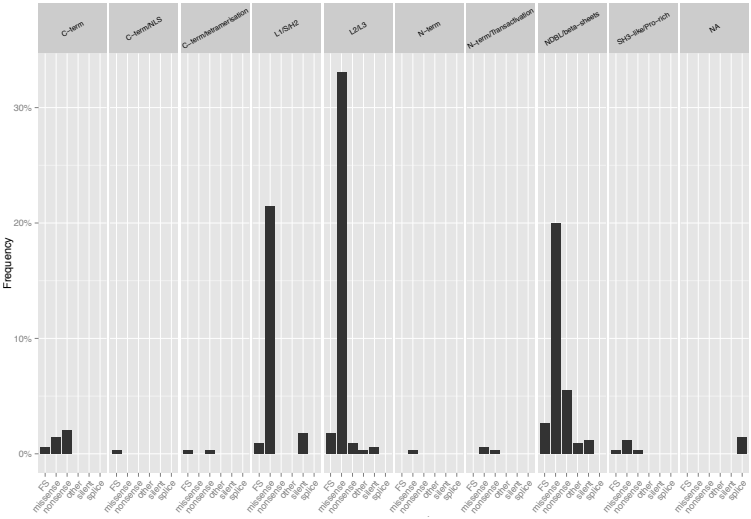

**B** TP53 Mutation Effects and Resulting p53 Protein Isoforms

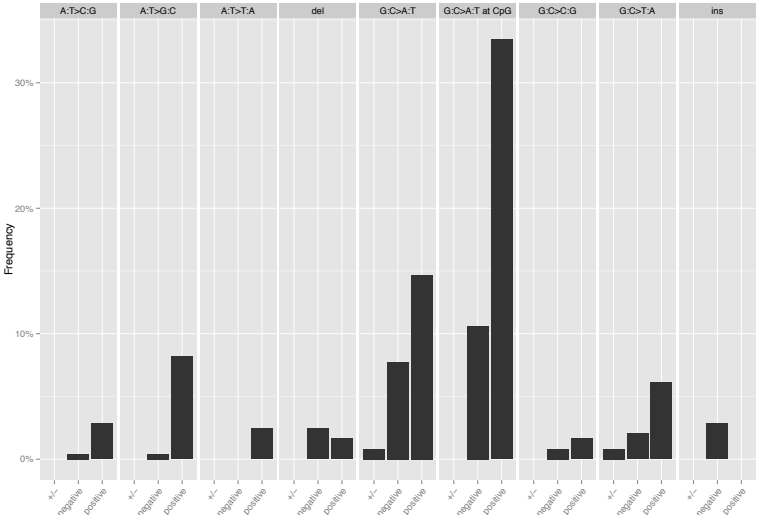

**C** TP53 Mutation Types & Immunohistochemistry

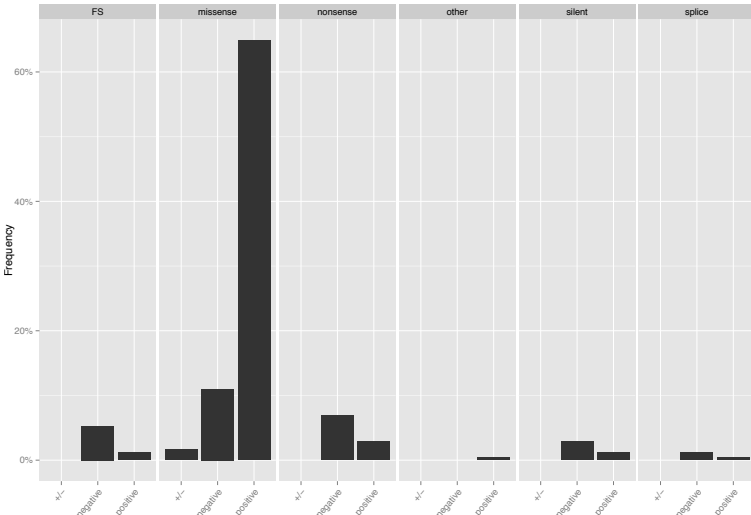

**D** TP53 Mutation Effects & Immunohistochemistry

**Supplementary Figure 2.**

p53 immunohistochemistry for TP53 mutations in EAC

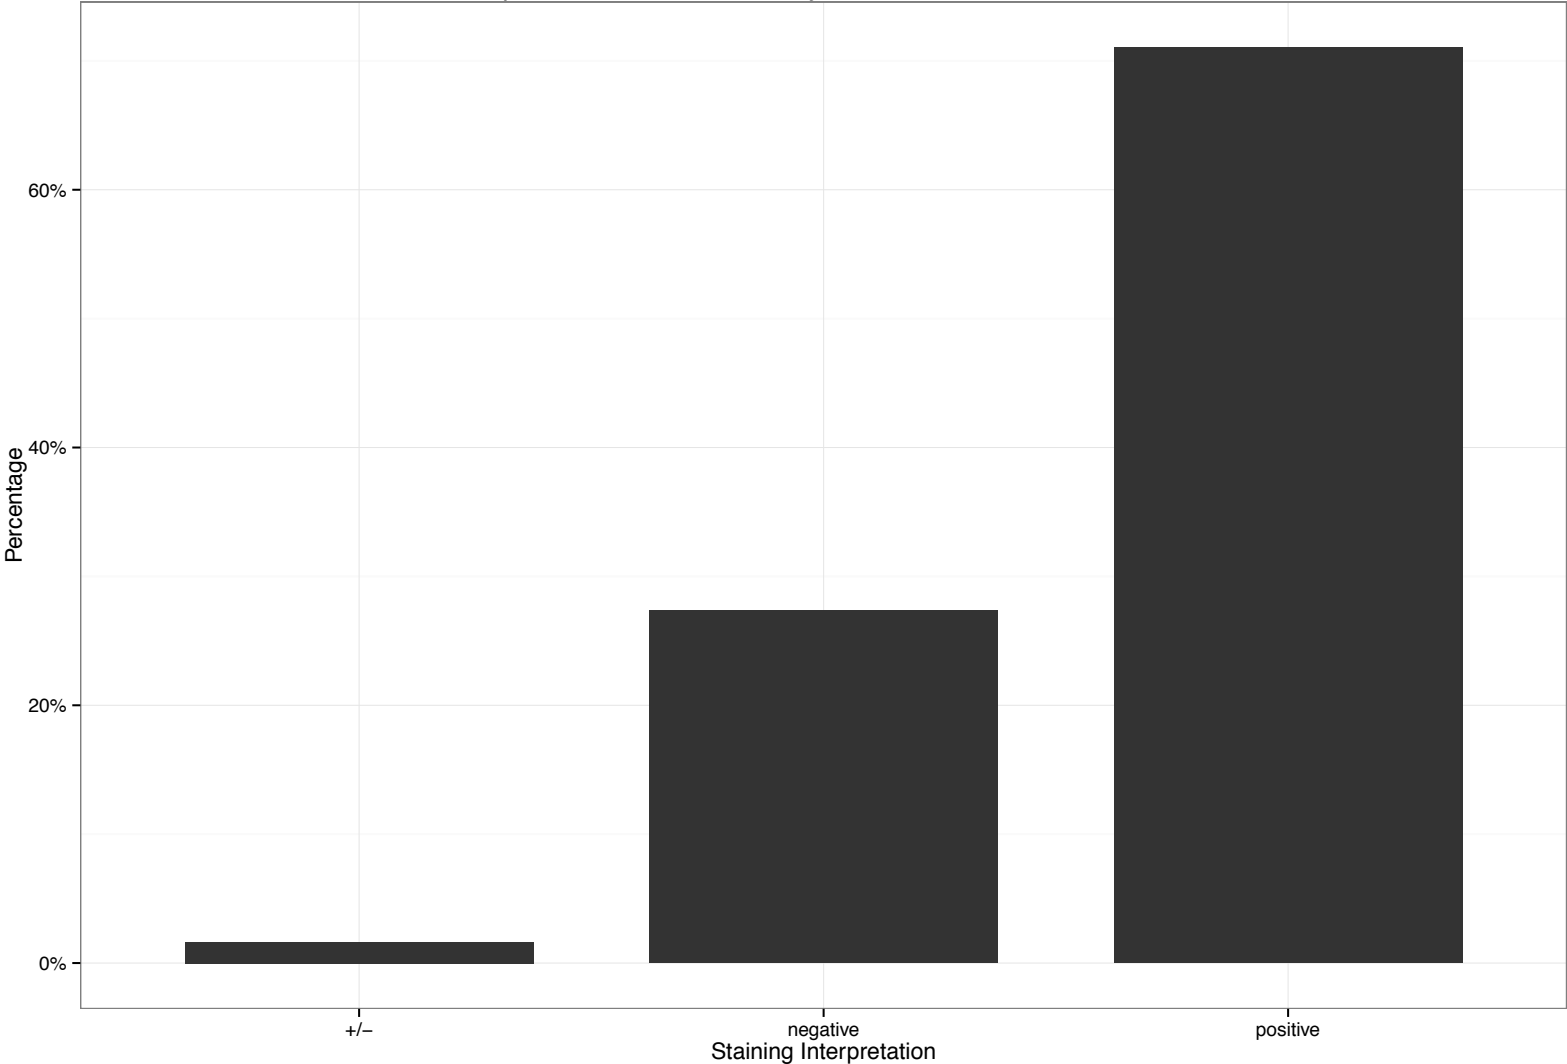

Supplementary Figure 3.

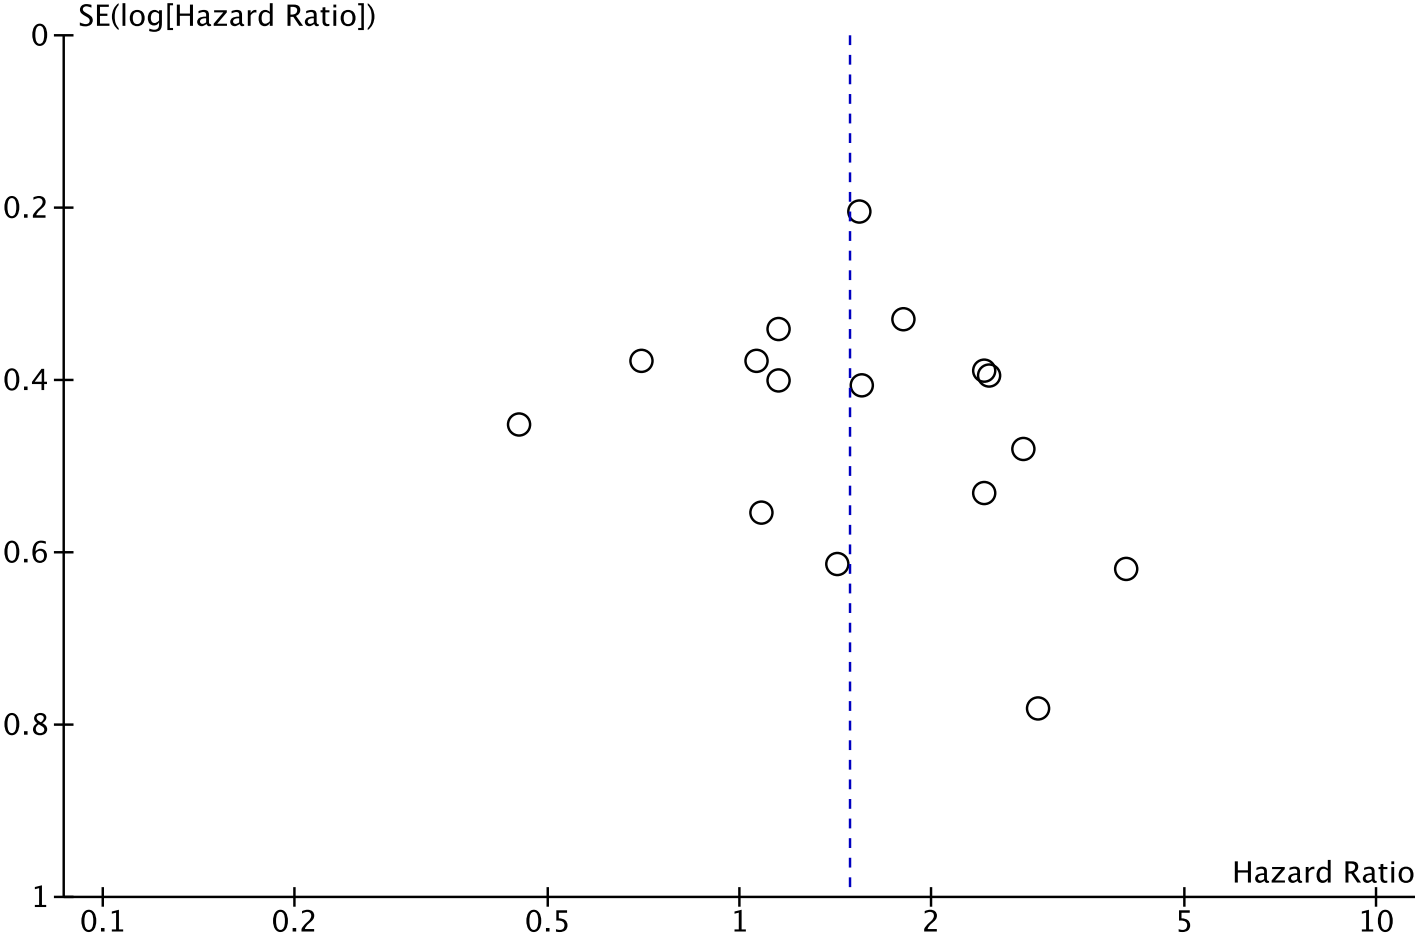

### Supplementary Figure 4.

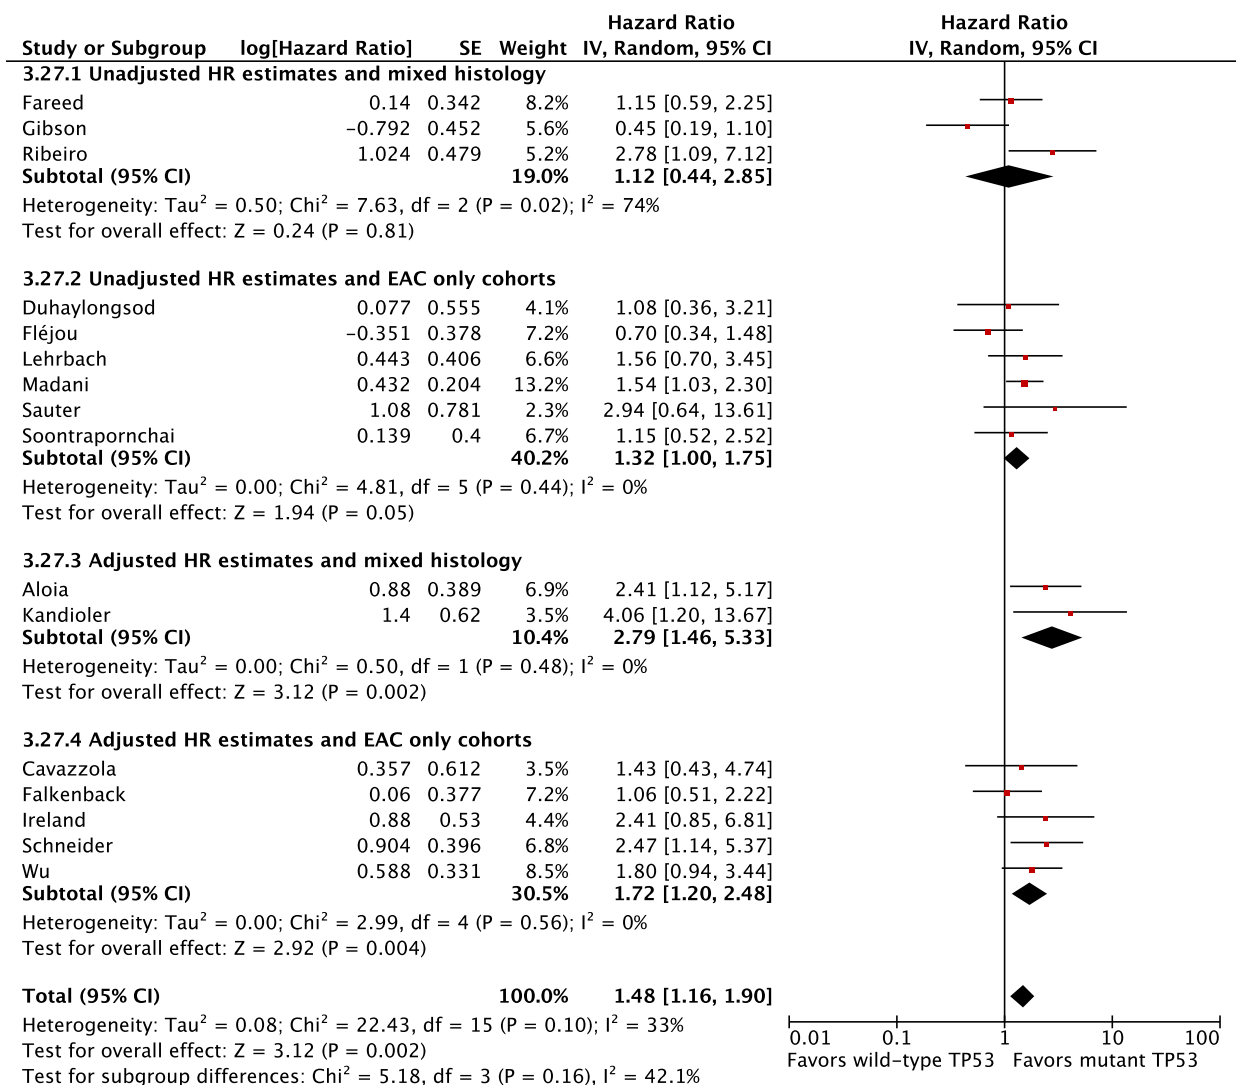

### Supplementary Figure 5.

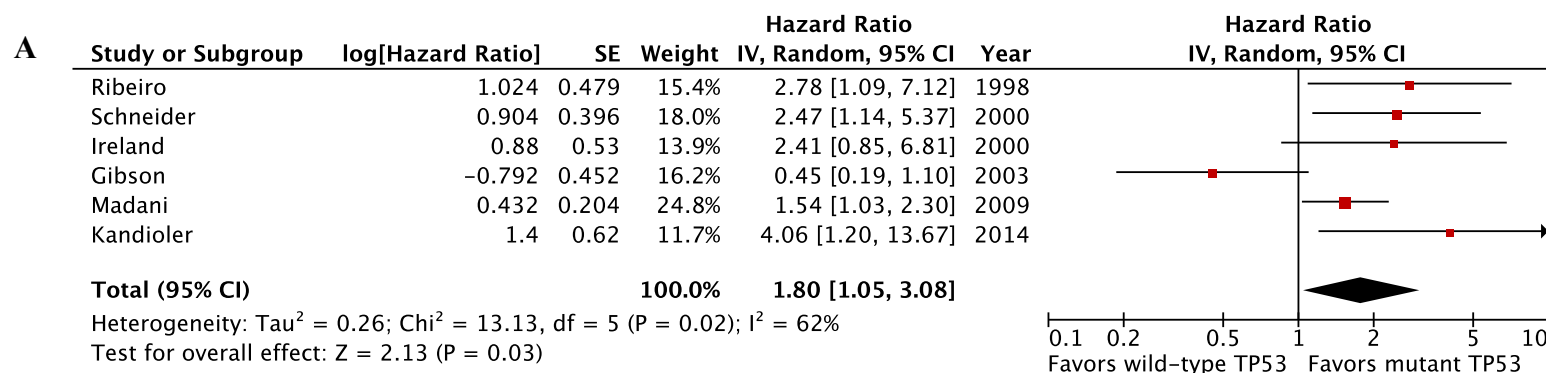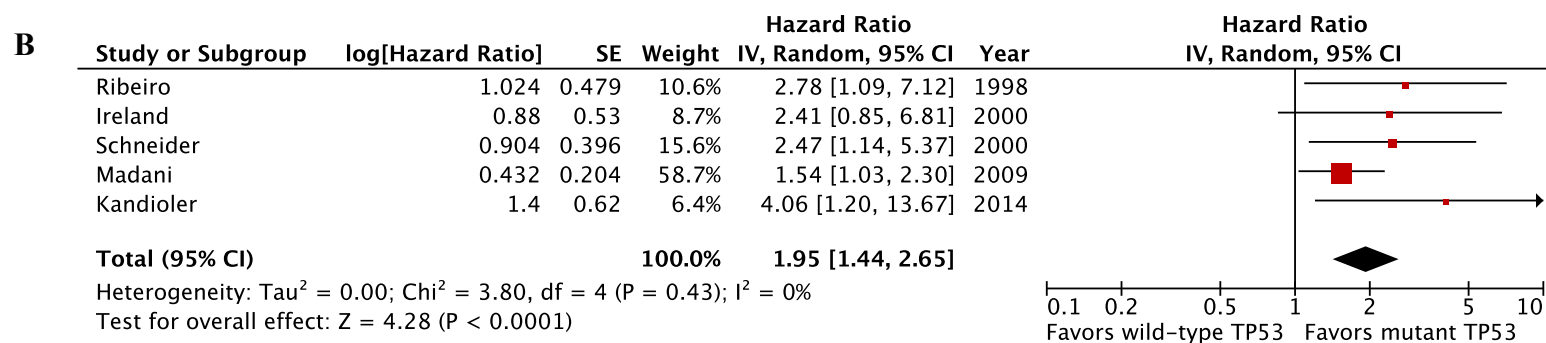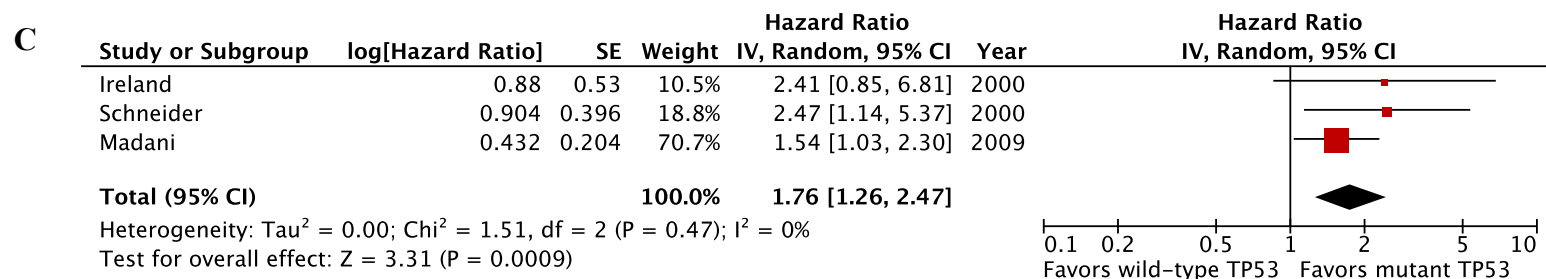



### Supplementary Figure 6.

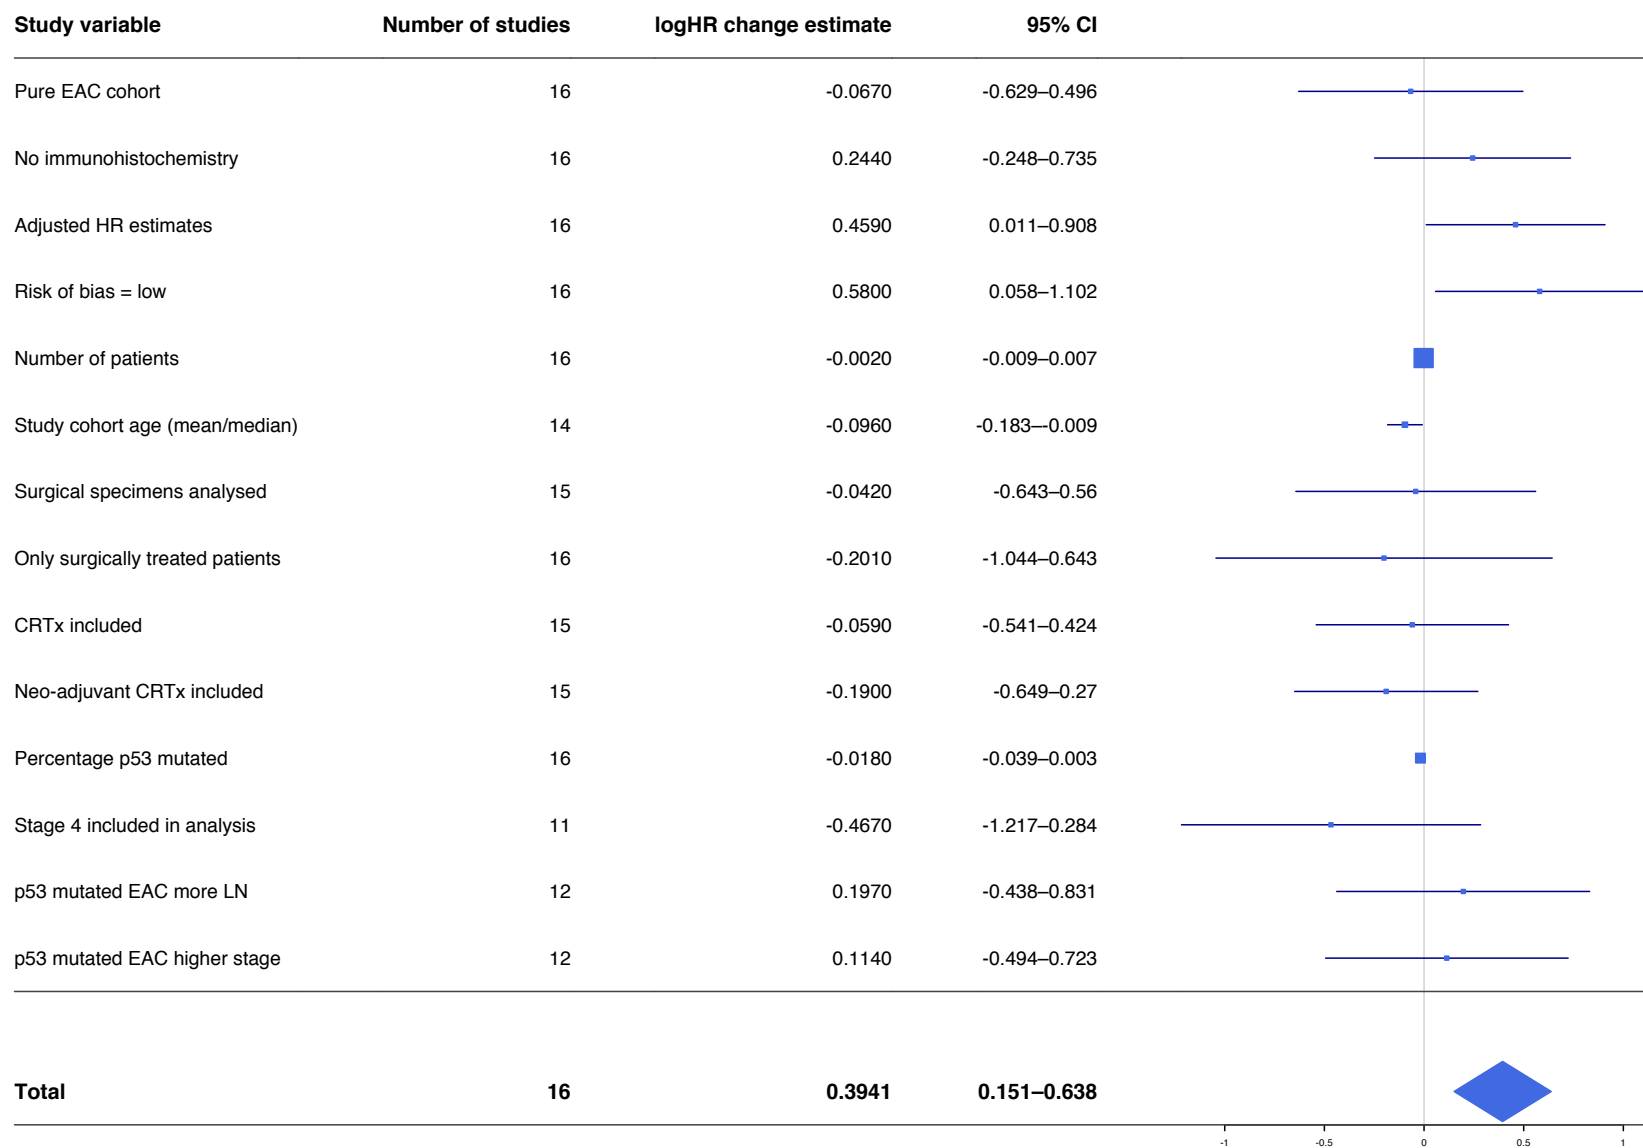

**Supplementary Table 1. Clinicopathological and survival data of all studies included in final meta-analysis.**

| Reference                     | N   | T x / T i s | T1           | T1a | T1b | T2 | T3            | T4 | N0 | N+  | N1 | N2 | Mx | M1 | G1 | G2 | G3 | Stage 0 | Stage I | Stage II | Stage III | Stage IV | TNM Stage Edition | R0  | R1 | R2 | RX | Median Survival Total (months) | Median Survival TP53 "mutated" | Median Survival TP53 "wild-type" |
|-------------------------------|-----|-------------|--------------|-----|-----|----|---------------|----|----|-----|----|----|----|----|----|----|----|---------|---------|----------|-----------|----------|-------------------|-----|----|----|----|--------------------------------|--------------------------------|----------------------------------|
| Fléjou <sup>38</sup>          | 62  | -           | 20           | 8   | 12  | 7  | 35            | -  | 30 | 32  | 32 | -  | -  | -  | 25 | 20 | 17 | -       | 19      | 14       | 23        | 6        | -                 | -   | -  | -  | -  | 28.0                           | 15                             | 15                               |
| Duhaylongsod <sup>39</sup>    | 42  | -           | -            | -   | -   | -  | -             | -  | 28 | 14  | -  | -  | -  | -  | -  | -  | -  | -       | -       | -        | -         | -        | -                 | -   | -  | -  | -  | -                              | 19.8                           | 18.2                             |
| Sauter <sup>47</sup>          | 24  | -           | -            | -   | -   | -  | -             | -  | 8  | 8   | -  | -  | -  | -  | 15 | -  | 8  | -       | -       | -        | -         | -        | -                 | -   | -  | -  | -  | -                              | 28.0                           | 13.0                             |
| Wu <sup>40</sup>              | 92  | -           | -            | -   | -   | -  | -             | -  | -  | -   | -  | -  | -  | -  | -  | -  | -  | -       | 11      | 24       | 42        | 15       | 4                 | -   | -  | -  | -  | 16.3                           | 10                             | 23                               |
| Ribeiro <sup>49</sup>         | 42  | 7           | 8            | -   | -   | 8  | 12            | -  | 19 | 18  | 18 | -  | -  | 1  | 4  | 15 | 13 | 7       | 4       | 17       | 8         | 1        | 4                 | -   | -  | -  | -  | -                              | 21.6                           | 40.2                             |
| Soontrapornchai <sup>48</sup> | 135 | -           | -            | -   | -   | -  | -             | -  | 20 | 34  | -  | -  | -  | 21 | 5  | 34 | 33 | -       | -       | -        | -         | -        | 5                 | -   | -  | -  | -  | -                              | 12.0                           | 14.0                             |
| Schneider <sup>42</sup>       | 59  | -           | -            | -   | -   | -  | -             | -  | -  | -   | -  | -  | -  | -  | 4  | 19 | 36 | 0       | 22      | 18       | 12        | 3        | 4                 | 49  | 4  | 2  | 4  | -                              | -                              | -                                |
| Ireland <sup>41</sup>         | 37  | -           | 5            | 3   | 2   | 7  | 19            | -  | 7  | 24  | 10 | 14 | -  | 2  | 4  | 13 | 14 | -       | -       | -        | -         | -        | -                 | -   | -  | -  | -  | -                              | 10                             | 28                               |
| Aloia <sup>50</sup>           | 61  | -           | 31           | -   | -   | 14 | 16            | -  | 61 | -   | -  | -  | -  | -  | -  | -  | -  | -       | 31      | 30       | 0         | 0        | 5                 | 61  | 0  | 0  | 0  | 38.3                           | 18.0                           | 49.0                             |
| Gibson <sup>51</sup>          | 54  | -           | -            | -   | -   | -  | -             | -  | -  | -   | -  | -  | -  | -  | 6  | 33 | 15 | -       | -       | -        | -         | -        | -                 | -   | -  | -  | -  | -                              | -                              | 20.7                             |
| Falkenbach <sup>43</sup>      | 54  | 4           | 16           | -   | -   | 7  | 32            | -  | 36 | 23  | 23 | -  | -  | 1  | -  | -  | -  | 4       | 16      | 17       | 21        | 1        | 6                 | -   | -  | -  | -  | 41.7                           | 41.7                           | 39.8                             |
| Madani <sup>44</sup>          | 142 | -           | 35 (T1 + T2) | -   | -   | -  | 107 (T2 + T3) | -  | 55 | 87  | 87 | -  | -  | 0  | 41 | 37 | 64 | 0       | 12      | 49       | 76        | 5        | -                 | 119 | 17 | 6  | -  | 20.0                           | 16                             | 25                               |
| Cavazzola <sup>46</sup>       | 46  | -           | 6            | -   | -   | 6  | 13            | 13 | 18 | 20  | 20 | -  | 1  | 3  | 6  | 12 | 20 | -       | 5       | 9        | 20        | 4        | -                 | 38  | 0  | 0  | -  | 70.4                           | 58.1                           | 63.2                             |
| Lehrbach <sup>45</sup>        | 75  | -           | 4            | -   | -   | 27 | 44            | 0  | 21 | 54  | 54 | -  | -  | 5  | -  | -  | -  | -       | 14      | 15       | 30        | 16       | 6                 | -   | -  | -  | -  | 21.5                           | 29.5                           |                                  |
| Fareed <sup>52</sup>          | 245 | 2           | 18           | -   | -   | 72 | 139           | 14 | 62 | 183 | -  | -  | -  | 2  | -  | -  | -  | -       | -       | -        | -         | -        | -                 | -   | -  | -  | -  | -                              | 26.7                           | 53.2                             |
| Kandioler <sup>33</sup>       | 36  | 3           | 5            | -   | -   | 7  | 13            | 8  | 10 | 17  | 17 | -  | -  | 3  | 5  | 13 | 8  | -       | -       | -        | -         | -        | -                 | 24  | 3  | -  | -  | 13.9                           | 8.6                            | 26.2                             |

| <b>Supplementary Table 2. Subgroup analyses</b>                                             |                          |                           |                           |                       |                                                                      |
|---------------------------------------------------------------------------------------------|--------------------------|---------------------------|---------------------------|-----------------------|----------------------------------------------------------------------|
| <b>Subgroup</b>                                                                             | <b>Number of studies</b> | <b>Number of patients</b> | <b>Pooled HR (95% CI)</b> | <b><i>p</i>-value</b> | <b>Heterogeneity <i>I</i><sup>2</sup> statistic (<i>p</i>-value)</b> |
| <b>Assay and histology type</b>                                                             |                          |                           |                           |                       |                                                                      |
| Immunohistochemistry only                                                                   | 8                        | 417                       | 1.28 (0.95 – 1.73)        | 0.10                  | 0% (0.43)                                                            |
| Immunohistochemistry only and pure EAC cohorts                                              | 6                        | 290                       | 1.14 (0.79 – 1.66)        | 0.49                  | 0% (0.57)                                                            |
| No immunohistochemistry                                                                     | 8                        | 471                       | 1.68 (1.14 – 2.47)        | 0.009                 | 50% (0.05)                                                           |
| No immunohistochemistry after sensitivity analysis                                          | 7                        | 425                       | 1.82 (1.40 – 2.36)        | <0.0001               | 0% (0.50)                                                            |
| No immunohistochemistry and pure EAC cohorts                                                | 5                        | 354                       | 1.68 (1.27 – 2.22)        | 0.0003                | 0% (0.64)                                                            |
| Sequencing only studies                                                                     | 6                        | 330                       | 1.80 (1.05 – 3.08)        | 0.03                  | 62% (0.02)                                                           |
| Sequencing only studies after sensitivity analysis                                          | 5                        | 284                       | 1.95 (1.44 – 2.65)        | <0.0001               | 0% (0.43)                                                            |
| Sequencing only studies and pure EAC cohorts                                                | 3                        | 213                       | 1.76 (1.26 – 2.47)        | 0.0009                | 0% (0.47)                                                            |
| <b>Adjustment for tumor stage</b>                                                           |                          |                           |                           |                       |                                                                      |
| Studies including HRs adjusting for standard prognostic variables                           | 7                        | 327                       | 1.94 (1.41 – 2.66)        | <0.0001               | 0% (0.53)                                                            |
| Studies including HRs adjusting for standard prognostic variables and pure EAC only cohorts | 5                        | 258                       | 1.72 (1.20 – 2.48)        | 0.004                 | 0% (0.56)                                                            |
| Studies with unadjusted HRs for standard prognostic variables                               | 9                        | 533                       | 1.22 (0.88 – 1.70)        | 0.24                  | 38% (0.12)                                                           |
| Studies with unadjusted HRs for standard prognostic variables, but pure EAC cohorts         | 6                        | 386                       | 1.32 (1.00 – 1.75)        | 0.05                  | 0% (0.44)                                                            |
| <b>Risk of bias and tumor type</b>                                                          |                          |                           |                           |                       |                                                                      |
| Low risk of bias                                                                            | 4                        | 197                       | 2.29 (1.50 – 3.48)        | 0.0001                | 0% (0.70)                                                            |
| Low risk of bias and EAC only cohorts                                                       | 3                        | 161                       | 2.11 (1.35 – 3.31)        | 0.001                 | 0% (0.80)                                                            |
| High and unclear risk of bias                                                               | 12                       | 691                       | 1.29 (0.98 – 1.70)        | 0.07                  | 30% (0.15)                                                           |

| High risk of bias <i>but</i> pure EAC cohort                                                                  | 8                        | 488                       | 1.29 (1.00 – 1.67)        | 0.05                  | 0% (0.64)                                                            |
|---------------------------------------------------------------------------------------------------------------|--------------------------|---------------------------|---------------------------|-----------------------|----------------------------------------------------------------------|
| <i>Table 3 continued.</i>                                                                                     |                          |                           |                           |                       |                                                                      |
| <b>Subgroup</b>                                                                                               | <b>Number of studies</b> | <b>Number of patients</b> | <b>Pooled HR (95% CI)</b> | <b><i>p</i>-value</b> | <b>Heterogeneity <i>I</i><sup>2</sup> statistic (<i>p</i>-value)</b> |
| <b>Other exploratory subgroups of interest</b>                                                                |                          |                           |                           |                       |                                                                      |
| Only chemo-radiotherapy naïve patients (regardless of risk of bias)                                           | 6                        | 397                       | 1.60 (1.21 – 2.11)        | 0.0009                | 0% (0.71)                                                            |
| Only chemo-radiotherapy naïve patients (regardless of risk of bias) <i>and</i> pure EAC only cohorts          | 5                        | 336                       | 1.50 (1.11 – 2.02)        | 0.0008                | 0% (0.80)                                                            |
| Only studies with no neo-adjuvant chemo-radiotherapy (regardless of risk of bias)                             | 7                        | 446                       | 1.68 (1.29 – 2.18)        | 0.0001                | 0% (0.67)                                                            |
| Only studies with no neo-adjuvant chemo-radiotherapy <i>and</i> pure EAC cohorts (regardless of risk of bias) | 6                        | 385                       | 1.60 (1.21 – 2.11)        | 0.0009                | 0% (0.69)                                                            |
